# Supplementary material
Source: PubMed Central journal article supplement (PMC4360113)

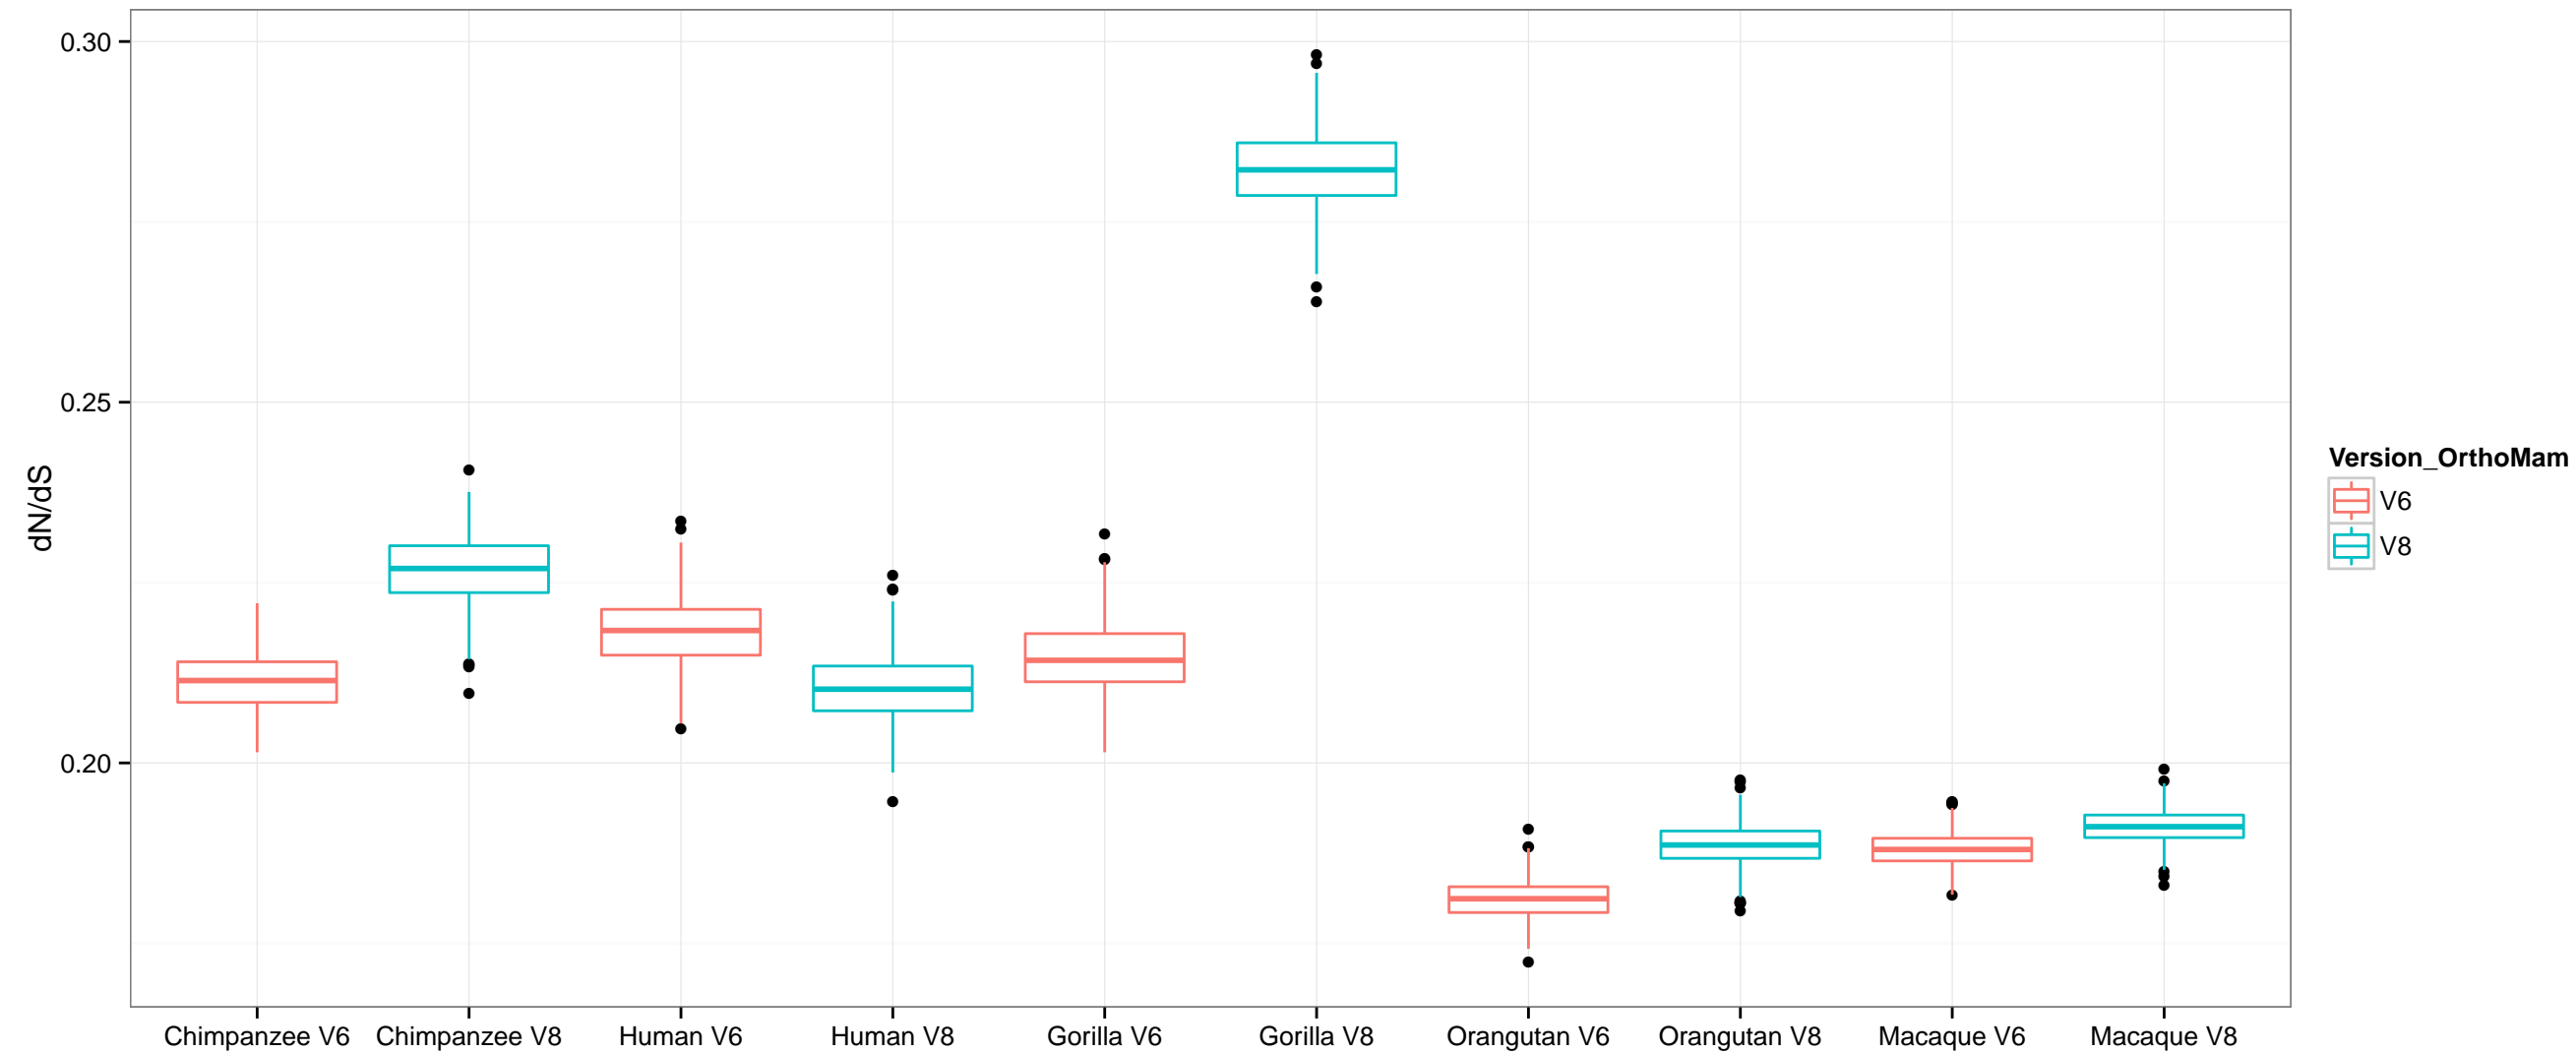

Supplement: rsbl20150010supp2.pdf [file rsbl20150010supp2.pdf]

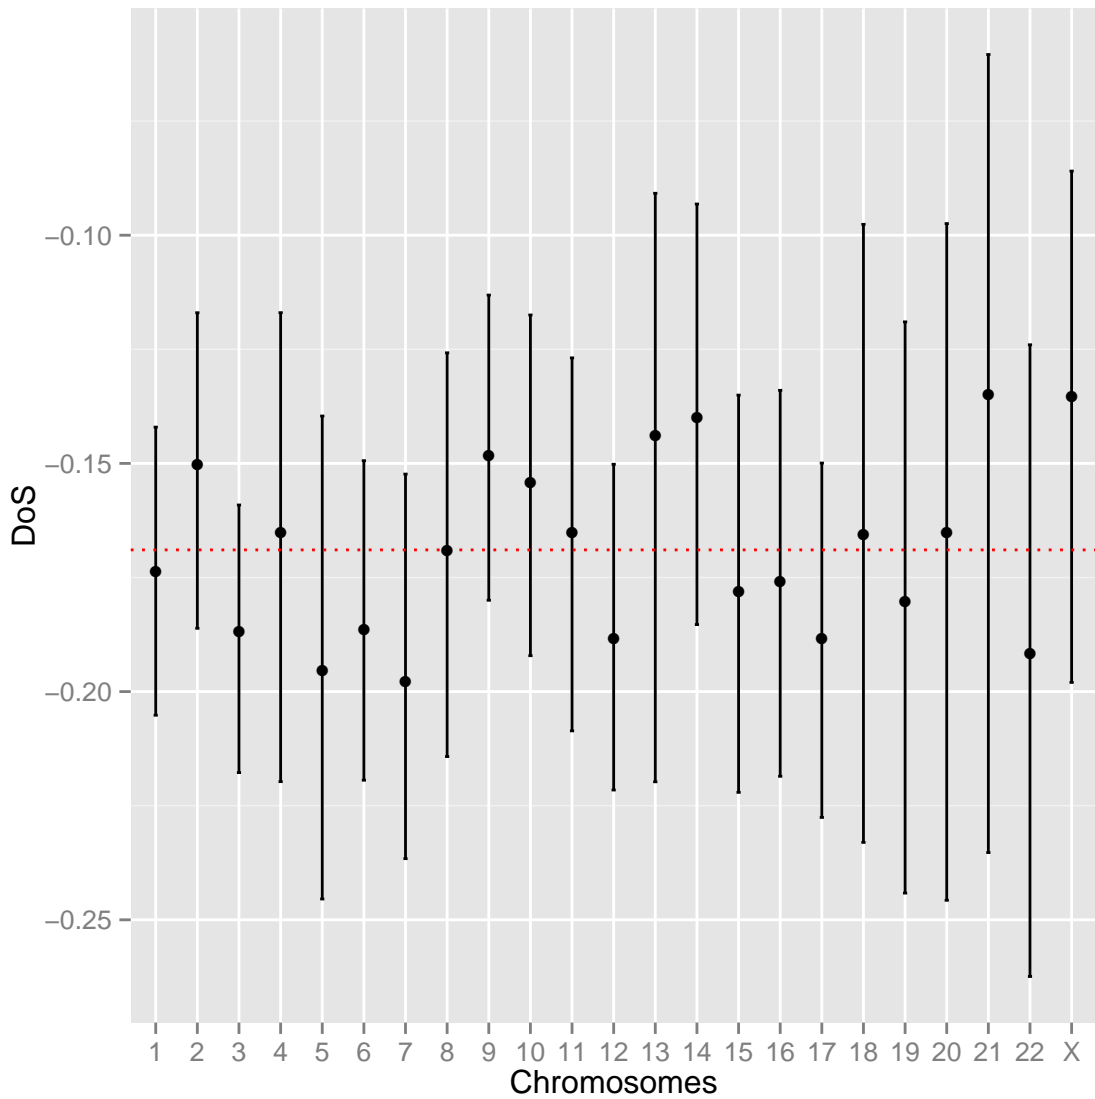

Supplement: rsbl20150010supp3.pdf [file rsbl20150010supp3.pdf]
